# Supplementary material for: Degradation of Plastics under Anaerobic Conditions: A Short Review
Source: PubMed Central journal article supplement (PMC7023122; doi:10.3390/polym12010109), 2020-01-05
Supplement: polymers-12-00109-s001.pdf [file polymers-12-00109-s001.pdf]

## Supporting Information

# Degradation of Plastics under Anaerobic Conditions: A Short Review

Xochitl Quecholac-Piña <sup>1</sup>, María del Consuelo Hernández-Berriel <sup>1</sup>, María del Consuelo Mañón-Salas <sup>2</sup>, Rosa María Espinosa-Valdemar <sup>3</sup> and Alethia Vázquez-Morillas <sup>3,\*</sup>

<sup>1</sup> Tecnológico Nacional de México/Instituto Tecnológico de Toluca, Av. Tecnológico s/n. Colonia Agrícola Bellavista Metepec, Edo. De México, México C.P. 52149, México; xquecholac@toluca.tecnm.mx (X.Q.-P.); mhernandezb@toluca.tecnm.mx (M.d.C.H.-B.)

<sup>2</sup> Sociedad Mexicana de Ciencia y Tecnología Aplicada a Residuos Sólidos, A.C., Priv Molcajete 44 Fracc. Hacienda de las fuentes, Calimaya, México C.P. 52227, México; consuelomanon@gmail.com

<sup>3</sup> Universidad Autónoma Metropolitana, Av San Pablo Xalpa 180, Reynosa Tamaulipas, Azcapotzalco, Ciudad de México 02200, México; rmev@azc.uam.mx

\* Correspondence: alethia@azc.uam.mx; Tel.: +52-55-53189057

**Table S1.** List of articles.

| No. | List of Articles                                                                                                                                                                                               | Reference |
|-----|----------------------------------------------------------------------------------------------------------------------------------------------------------------------------------------------------------------|-----------|
| 1   | Degradation of some EN13432 compliant plastics in simulated mesophilic anaerobic digestion of food waste                                                                                                       | [1]       |
| 2   | Biodegradation of poly(3-hydroxybutyrate-co-3-hydroxyhexanoate) plastic under anaerobic sludge and aerobic seawater conditions: gas evolution and microbial diversity                                          | [2]       |
| 3   | Effects of disposable plastics and wooden chopsticks on the anaerobic digestion of food waste                                                                                                                  | [3]       |
| 4   | Biocomposite fiber-matrix treatments that enhance in-service performance can also accelerate end-of-life fragmentation and anaerobic biodegradation to methane                                                 | [4]       |
| 5   | The characteristic changes of rice straw fibers in anaerobic digestion and its effect on rice straw-reinforced composite                                                                                       | [5]       |
| 6   | Methodology to assess end-of-life anaerobic biodegradation kinetics and methane production potential for composite materials                                                                                   | [6]       |
| 7   | Assessment of models for anaerobic biodegradation of a model bioplastic: Poly(hydroxybutyrate-co-hydroxyvalerate)                                                                                              | [7]       |
| 8   | Estimation of the microbial degradation of biodegradable polymer, poly(lactic acid) (PLA) with a specific gas production rate                                                                                  | [8]       |
| 9   | Biodegradation of poly(Lactic acid), poly(hydroxybutyrate-co-hydroxyvalerate), poly(butylene succinate) and poly(butylene adipate-co-terephthalate) under anaerobic and oxygen limited thermophilic conditions | [9]       |
| 10  | New polymer behavior under the landfill conditions                                                                                                                                                             | [10]      |
| 11  | Anaerobic digestion of aliphatic polyesters                                                                                                                                                                    | [11]      |
| 12  | Anaerobic biodegradation, physical and structural properties of normal and high-amylose maize starch films                                                                                                     | [12]      |
| 13  | Biodegradability of poly(lactic acid) (PLA)/lactic acid (LA) blends using anaerobic digester sludge                                                                                                            | [13]      |
| 14  | Microbial colonization and degradation of polyethylene and biodegradable plastic bags in temperate fine-grained organic-rich marine sediments                                                                  | [14]      |
| 15  | PVC degradation by Fenton reaction and biological decomposition                                                                                                                                                | [15]      |
| 16  | Influence of biodegradation in thermophilic anaerobic aqueous conditions on crystallization of poly(butylene succinate)                                                                                        | [16]      |
| 17  | Degradation of a Polycaprolactone/Eggshell Biocomposite in a Bioreactor                                                                                                                                        | [17]      |
| 18  | Microbial consortium involving biological methane oxidation in relation to the biodegradation of waste plastics in a solid waste disposal open dump site                                                       | [18]      |
| 19  | Anaerobic biodegradation of polymer composites filled with natural fibers                                                                                                                                      | [19]      |
| 20  | Evaluation of biodegradation-promoting additives for plastics                                                                                                                                                  | [20]      |
| 21  | Biodegradation of waste PET based co polyesters in thermophilic anaerobic sludge                                                                                                                               | [21]      |
| 22  | Degradation of biodegradable/degradable plastics in municipal solid-waste landfill                                                                                                                             | [22]      |

| No. | List of Articles                                                                                                                                                                     | Reference |
|-----|--------------------------------------------------------------------------------------------------------------------------------------------------------------------------------------|-----------|
| 23  | Biodegradability of crude glycerol-based polyurethane foams during composting, anaerobic digestion and soil incubation                                                               | [23]      |
| 24  | Comparative oxo-biodegradation study of poly-3-hydroxybutyrate-co-3-hydroxyvalerate/polypropylene blend in controlled environments                                                   | [24]      |
| 25  | Mesophilic anaerobic biodegradation test and analysis of eubacteria and archaea involved in anaerobic biodegradation of four specified biodegradable polyesters                      | [25]      |
| 26  | Biodegradability of conventional and bio-based plastics and natural fiber composites during composting, anaerobic digestion and long-term soil incubation                            | [26]      |
| 27  | Thermophilic anaerobic biodegradation test and analysis of eubacteria involved in anaerobic biodegradation of four specified biodegradable polyesters                                | [27]      |
| 28  | Assessment of anaerobic degradation of Ingeo™ polylactides under accelerated landfill conditions                                                                                     | [28]      |
| 29  | Anaerobic biodegradation of poly (Lactic Acid) film in anaerobic sludge                                                                                                              | [29]      |
| 30  | Evaluation of strength properties of polypropylene-based polymers in simulated landfill and oven conditions                                                                          | [30]      |
| 31  | Biodegradability and biodegradation rate of poly (caprolactone)-starch blend and poly(butylene succinate) biodegradable polymer under aerobic and anaerobic environment              | [31]      |
| 32  | RNA analysis of anaerobic sludge during anaerobic biodegradation of cellulose and poly(lactic acid) by RT-PCR–DGGE                                                                   | [32]      |
| 33  | Anaerobic biodegradation of the microbial copolymer poly(3-hydroxybutyrate-co-3-hydroxyhexanoate): effects of comonomer content, processing history, and semi-crystalline morphology | [33]      |
| 34  | Anaerobic digestion of starch–polyvinyl alcohol biopolymer packaging: Biodegradability and environmental impact assessment                                                           | [34]      |
| 35  | Promotion of poly lactide degradation by ammonia under hyperthermophilic anaerobic conditions                                                                                        | [35]      |
| 36  | Enhanced mineralization of PLA meltblown materials due to plasticization                                                                                                             | [36]      |
| 37  | Bioplastic biodegradation activity of anaerobic sludge prepared by pre-incubation at 55°C for new anaerobic biodegradation test                                                      | [37]      |
| 38  | Biodegradation of treated polylactic acid (PLA) under anaerobic conditions                                                                                                           | [38]      |
| 39  | Anaerobic biodegradation of polyhydroxybutyrate in municipal sewage sludge                                                                                                           | [39]      |
| 40  | The anaerobic degradability of thermoplastic starch: Polyvinyl alcohol blends: Potential biodegradable food packaging materials                                                      | [40]      |
| 41  | Characteristics of fermentation of biodegradable plastics mixed with household solid waste by thermophilic dry anaerobic co-digestion                                                | [41]      |
| 42  | Anaerobic biodegradation tests of poly(lactic acid) under mesophilic and thermophilic conditions using a new evaluation system for methane fermentation in anaerobic sludge          | [42]      |
| 43  | Anaerobic biodegradation tests of poly(lactic acid) and polycaprolactone using new evaluation system for methane fermentation in anaerobic sludge                                    | [43]      |
| 44  | Determining biodegradability of polylactic acid under different environments                                                                                                         | [44]      |
| 45  | Biodegradability of biodegradable/degradable plastic materials under aerobic and anaerobic conditions                                                                                | [45]      |
| 46  | Laboratory investigation of biodegradability of a polyurethane foam under anaerobic conditions                                                                                       | [46]      |
| 47  | Considerations Affecting Landfill Biodegradability of PVC                                                                                                                            | [47]      |
| 48  | Impacts of temperature on the leaching of organotin compounds from poly(vinyl chloride) plastics-A study conducted under simulated landfill conditions                               | [48]      |
| 49  | Aerobic and anaerobic biodegradability of polymer films and physico-chemical characterization                                                                                        | [49]      |
| 50  | Biodegradation of aliphatic homopolyesters and aliphatic-aromatic copolyesters by anaerobic microorganisms                                                                           | [50]      |
| 51  | The degradability of biodegradable plastics in aerobic and anaerobic waste landfill model reactors                                                                                   | [51]      |
| 52  | Anaerobic biodegradation of aliphatic polyesters: poly(3-hydroxybutyrate-co-3-hydroxyoctanoate) and poly( $\epsilon$ -caprolactone)                                                  | [52]      |
| 53  | Degradation of natural and synthetic polyesters under anaerobic conditions                                                                                                           | [53]      |
| 54  | Fate of plasticised PVC products under Landfill conditions: a laboratory-scale landfill simulation reactor study                                                                     | [54]      |
| 55  | Long term behaviour of poly(vinyl chloride) products under soil buried and landfill conditions                                                                                       | [55]      |
| 56  | Migration and release profile of chimassorb 944 from low-density                                                                                                                     | [56]      |

| No. | List of Articles                                                                                                                       | Reference |
|-----|----------------------------------------------------------------------------------------------------------------------------------------|-----------|
| 57  | Biodegradable films made from low-density polyethylene (LDPE), rice starch and potato starch for food packaging applications: Part 1   | [57]      |
| 58  | Testing anaerobic biodegradability of polymers in a laboratory-scale simulated landfill                                                | [58]      |
| 59  | Biodegradable films made from low density polyethylene (LDPE), wheat starch and soluble starch for food packaging applications. Part 2 | [59]      |
| 60  | Anaerobic degradation of poly-3-hydroxybutyrate and poly-3-hydroxybutyrate-co-3-hydroxyvalerate                                        | [60]      |
| 61  | Biodegradability of degradable plastics exposed to anaerobic digested sludge and simulated landfill conditions                         | [61]      |
| 62  | Starch esters as biodegradable plastics: effects of ester group chain length and degree of substitution on anaerobic biodegradation    | [62]      |
| 63  | Biodegradation of poly- $\beta$ -hydroxyalkanoates in anaerobic sediments                                                              | [63]      |
| 64  | Biodegradability: an assessment of commercial polymers according to the Canadian method for anaerobic conditions                       | [64]      |
| 65  | Confirmation of anaerobic poly(2-oxepanone) degrading microorganisms in environments                                                   | [65]      |
| 66  | Assessment of biodegradation of water insoluble polymeric materials in aerobic and anaerobic aquatic environments                      | [66]      |
| 67  | Degradation of starch-plastic composites in a municipal solid waste landfill                                                           | [67]      |
| 68  | Methanogenic degradation of poly(3-hydroxyalkanoates)                                                                                  | [68]      |
| 69  | Effects of natural polymer acetylation on the anaerobic bioconversion to methane and carbon dioxide                                    | [69]      |
| 70  | Biodegradability of modified plastic films in controlled biological environments                                                       | [70]      |

**Table S2.** Summary of experimental conditions and results.

| Reference | Type plastic                                                                                                                                                                                                                       | Degradation         | Co-substrate                                                                                      | Working volume | Temperature | Duration   | Scale      | % Biodegradation | Biogas                       |
|-----------|------------------------------------------------------------------------------------------------------------------------------------------------------------------------------------------------------------------------------------|---------------------|---------------------------------------------------------------------------------------------------|----------------|-------------|------------|------------|------------------|------------------------------|
| [1]       | Polypropylene<br>Low density polyethylene<br>Cellulose-based metallized<br>Cellulose-based heat- sealable<br>Cellulose-based non heat- sealable<br>Starch-based film blend 1<br>Starch-based film blend 2<br>Poly lactic Acid Film | Anaerobic digestion | Post-consumer domestic food waste and card packaging at a ratio of 80:20% on a fresh weight basis | 4.5 L          | 37 °C       | 147 day    | Laboratory | -                | -                            |
| [2]       | Poly (3-hydroxybutyrate-co-3-hydroxyhexanoate) (PHPH)                                                                                                                                                                              | Anaerobic digestion | -                                                                                                 | 500 mL         | 38 °C       | 85 days    | Laboratory | -                | -                            |
| [3]       | Polystyrene (PS)<br>Polypropylene (PP)<br>High density polyethylene (HDPE)<br>Wooden chopsticks (WC)                                                                                                                               | Anaerobic digestion | Food waste                                                                                        | 1000 mL        | 35 °C       | 30-35 days | Laboratory | -                | -                            |
| [4]       | Poly (hydroxybutyrate-co-hydroxyvalerate) (PHBV)<br>Poly (hydroxybutyrate-co-hydroxyvalerate) (PHBV) with wood fiber (WF)                                                                                                          | Anaerobic digestion | -                                                                                                 | 600 mL         | 37 °C       | 84 days    | Laboratory | -                | -                            |
| [5]       | Rice straw/low-density polyethylene (RS/LDPE)                                                                                                                                                                                      | Anaerobic digestion |                                                                                                   | 5 L            | 37 °C       | 30 days    | Laboratory | -                | 71800 mL                     |
| [6]       | Poly (hydroxybutyrate-co-hydroxyvalerate) (PHBV)<br>Composites with wood fiber (WF) (0%, 20%, 40%)                                                                                                                                 | Anaerobic digestion |                                                                                                   | 600 mL         | 37 °C       | 56 days    | Laboratory | -                | -                            |
| [7]       | Poly (hydroxybutyrate-co-hydroxyvalerate) (PHBV)                                                                                                                                                                                   | Anaerobic digestion | -                                                                                                 | 600 mL         | 37 °C       | 42 days    | Laboratory | 86%              | -                            |
| [8]       | Poly (lactic acid) (PLA)                                                                                                                                                                                                           | Anaerobic digestion | 40 mM acetate was augmented in phase I, 4 mM in phase II and finally 0 mM in phase III            | 250 mL         | 37 °C       | 30 days    | Laboratory | -                | 0.35 mmol/day m <sup>2</sup> |

| Reference | Type plastic                                                                                                                                                                     | Degradation         | Co-substrate              | Working volume                        | Temperature  | Duration | Scale      | % Biodegradation   | Biogas                         |
|-----------|----------------------------------------------------------------------------------------------------------------------------------------------------------------------------------|---------------------|---------------------------|---------------------------------------|--------------|----------|------------|--------------------|--------------------------------|
| [9]       | Poly (lactic acid) (PLA), Poly (hydroxybutyrate-co-hydroxyvalerate) (PHBV), Poly (butylene succinate) (PBS), and poly (butylene adipate-co-terephthalate) (PBAT)                 | Landfill            | Waste solid               | 660 mL                                | 52 °C        | 75 days  | Laboratory | -                  | -                              |
| [10]      | High-density polyethylene (HDPE) with the totally degradable plastic additives (TDPA)<br>Polyethylene (PE) labeled as 100% degradable<br>Compostable Starch and Polycaprolactone | Landfill            | Municipal waste           | Real                                  | 6.2 -20.8    | 2 years  | Landfill   | -                  | -                              |
| [11]      | Poly (L-lactic acid) (PLA)<br>Poly ( $\epsilon$ -caprolactone) (PCL)                                                                                                             | Anaerobic digestion | -                         | 120 mL                                | 55 °C        | 150 days | Laboratory | PCL 74%, PLA 62%   | PLA 676–677 mL/g TS            |
| [12]      | Starch/polyvinyl alcohol (PVA) blend                                                                                                                                             | Anaerobic digestion | -                         | 1 L                                   | 35 °C        | 26 days  | Laboratory | 52.09% $\pm$ 0.95% | (7980 $\pm$ 20 mL)             |
| [13]      | Poly (lactic acid) (PLA)<br>PLA blend                                                                                                                                            | Anaerobic digestion | -                         | 250 mL                                | 37 °C        | 30 days  | Laboratory | -                  | 0.0068 mmol/day m <sup>2</sup> |
| [14]      | Polyethylene (PE)<br>Biodegradable polyester                                                                                                                                     | Anaerobic digestion | -                         | 200 mL                                | -            | 98 days  | Laboratory | -                  | -                              |
| [15]      | Poly vinyl chloride (PVC)                                                                                                                                                        | Anaerobic digestion | -                         | 650 mL                                | 37–38 °C     | 7 days   | Laboratory | -                  | 7.7 mL                         |
| [16]      | Poly (butylene succinate) (PBS)                                                                                                                                                  | Anaerobic digestion | -                         | 250 mL /100 mL                        | 55–37 °C     | 113 days | Laboratory | -                  | -                              |
| [17]      | Polycaprolactone (PCL)/eggshell (ES) biocomposite (50/50 w/w)                                                                                                                    | Anaerobic digestion | -                         | -                                     | 43 °C        | 8 weeks  | Laboratory | -                  | -                              |
| [18]      | High/low density polyethylene, HDPE/LDPE<br>Poly- propylene, PP<br>Polystyrene, PS                                                                                               | Landfill            | Stabilized organic wastes | Diameter of 5 cm and length of 150 cm | 28–30 °C     | 357 days | Laboratory | -                  | -                              |
| [19]      | Poly (lactic acid), polyhydroxybutyrate-co-polyhydroxyvalerate and low density polyethylene                                                                                      | Anaerobic digestion | -                         | 120 mL                                | 36 °C        | 28 days  | Laboratory | -                  | 936.6 ml/g PHB/PHV             |
| [20]      | Polyethylene (PE)                                                                                                                                                                | Anaerobic digestion | Household waste           | 125 mL                                | 35 and 50 °C | 464 days | Laboratory | -                  | -                              |

| Reference | Type plastic                                                                                                                                                                                | Degradation         | Co-sustrate                                   | Working volume | Temperature       | Duration | Scale      | % Biodegradation                                                                                                                                                                                              | Biogas                                                |
|-----------|---------------------------------------------------------------------------------------------------------------------------------------------------------------------------------------------|---------------------|-----------------------------------------------|----------------|-------------------|----------|------------|---------------------------------------------------------------------------------------------------------------------------------------------------------------------------------------------------------------|-------------------------------------------------------|
|           | Polyethylene terephthalate (PET)                                                                                                                                                            |                     |                                               |                |                   |          |            |                                                                                                                                                                                                               |                                                       |
| [21]      | Poly (ethylene terephthalate-co-lactate) copolyesters                                                                                                                                       | Anaerobic digestion | -                                             | 120 mL         | 55 °C             | 394 days | Laboratory | -                                                                                                                                                                                                             | -                                                     |
|           | Polyethylene sample with the additive                                                                                                                                                       |                     |                                               |                |                   |          |            |                                                                                                                                                                                                               |                                                       |
| [22]      | Polyethylene (PE) labeled as 100% degradable Compostable Starch and Polycaprolactone                                                                                                        | Landfill            | Waste solid                                   | Real           | 3.4-20.58 °C      | 1 year   | Real       | No modification of structure                                                                                                                                                                                  | -                                                     |
|           | Polyurethane (PU) foams made from crude glycerol Polyurethane (PU) Petroleum- based polyols                                                                                                 | Anaerobic digestion | -                                             | 2 L            | 37 °C             | 105 days | Laboratory | PU foams made from bio-based 8.95% blend polyols 8.5%                                                                                                                                                         | -                                                     |
| [24]      | Poly-3-hydroxybutyrate-co-3-hydroxyvalerate (PHBV) copolymer as a biodegradable additive in polypropylene (PP)                                                                              | Anaerobic digestion | -                                             | -              | 25, 35, 45, 55 °C | 28 days  | Laboratory | -                                                                                                                                                                                                             | -                                                     |
| [25]      | Poly (caprolactone) (PCL)<br>Poly (lactic acid) (PLA)<br>Polyhydroxybutyrate (PHB)<br>Poly (butylene succinate) (PBS)                                                                       | Anaerobic digestion | -                                             | 1.5 L          | 37 °C             | 277 days | Laboratory | PCL: 12.5%<br>PLA: 39%<br>PHB: 92.5%<br>PBS: 0                                                                                                                                                                | 2.07 L<br>4.05 L<br>10.61 L                           |
| [26]      | Blend of polypropylene (PP) with 2% additive<br>Blend of polyethylene terephthalate (PETE) with 1% additive<br>Plastarch <sup>[1]</sup> <sub>SEP</sub><br>Co-polyester p corn-based plastic | Anaerobic digestion | the organic fraction of municipal solid waste | 2 L            | 37 °C             | 50 days  | Laboratory | Blend of polypropylene (PP) with 2% additive 3.1<br>Blend of polyethylene terephthalate (PETE) with 1% additive 2.2<br>Plastarch <sup>[1]</sup> <sub>SEP</sub> 26.4<br>Co-polyester p corn-based plastic 20.2 | -                                                     |
| [27]      | Polycaprolactone (PCL)<br>Poly (lactic acid) (PLA)<br>Polyhydroxybutyrate (PHB)<br>Poly (butylene succinate) (PBS)                                                                          | Anaerobic digestion | -                                             | 2 L            | 55 °C             | 50 days  | Laboratory | PHB 90%<br>PCL 80%<br>PLA 75%                                                                                                                                                                                 | PHB 10.25 L<br>PCL 9.93 L<br>PLA 7.41 L<br>PBS 0.54 L |

| Reference | Type plastic                                                               | Degradation                     | Co-sustrate                                                      | Working volume     | Temperature             | Duration              | Scale         | % Biodegradation                                                     | Biogas                                                      |
|-----------|----------------------------------------------------------------------------|---------------------------------|------------------------------------------------------------------|--------------------|-------------------------|-----------------------|---------------|----------------------------------------------------------------------|-------------------------------------------------------------|
|           |                                                                            |                                 |                                                                  |                    |                         |                       |               | PBS could not be anaerobically biodegraded                           |                                                             |
| [28]      | Poly lactide (PLA) semicrystalline, one amorphous                          | Anaerobic digestion<br>Landfill | high amount of pre-treated municipal solid waste fraction        | 2 L                | 35 °C<br>21 °C          | 170 days<br>13 months | Laboratory    | Anaerobic digestion : amorphous PLA 36%<br>Landfill: not biodegraded | -                                                           |
| [29]      | Poly (lactic acid) (PLA)                                                   | Anaerobic digestion             | -                                                                | 1.5 L              | 55 °C                   | 57 days               | Laboratory    | 77.25%                                                               | 7.07 L                                                      |
| [30]      | Polypropylene (PP)                                                         | Landfill                        | 50% biosolids and 50% (volume basis) municipal solid waste (MSW) | 208 L              | 35 °C, 45 °C, and 60 °C | 52 weeks              | Pilot         | -                                                                    | -                                                           |
| [31]      | Poly (caprolactone) (PCL)-starch blend<br>Poly (butylene succinate) (PBS)  | Anaerobic digestion<br>Landfill | -<br>Municipal solid waste                                       | 250 mL<br>Landfill | 35 °C                   | 139 days<br>90 days   | Real landfill | PCL-starch blend 83% PBS 2%<br>Physical deterioration                | 669 mL-CH <sub>4</sub> /g-VS<br>11 mL-CH <sub>4</sub> /g-VS |
| [32]      | poly(lactic acid) (PLA)                                                    | Anaerobic digestion             | -                                                                | 1.5 L              | 55 °C                   | 45 days               | Laboratory    | 70%                                                                  | 7.16 L                                                      |
| [33]      | poly(3-hydroxybutyrate-co-3-hydroxyhexanoate)                              | Anaerobic digestion             | -                                                                | 50 mL              | 37 °C                   | 12 days               | Laboratory    | 95%                                                                  | -                                                           |
| [34]      | starch-polyvinyl alcohol (PVOH)                                            | Anaerobic digestion             | -                                                                | 165 mL             | 37 °C                   | 115 days              | Laboratory    | 60%                                                                  | -                                                           |
| [35]      | Poly lactide (PLA) 100%<br>Poly lactide (PLA) 70%                          | Anaerobic digestion             | Kitchen garbage and ammonia                                      | 1 L                | 80 °C and 55 °C         | 22 days               | Laboratory    | PLA (100%) 81.8%<br>PLA (70%) 77.0%                                  | -                                                           |
| [36]      | Poly lactic acid (PLA) with Poly (propylene glycol) (PPG)                  | Anaerobic digestion             | -                                                                | -                  | 35 and 50 °C            | ~182 days             | Laboratory    | 90%                                                                  | -                                                           |
| [37]      | Poly (lactic acid) (PLA)                                                   | Anaerobic digestion             | -                                                                | 1.5 L              | 37 and 55 °C            | 100 days              | Laboratory    | 91.5%                                                                | 8.92                                                        |
| [38]      | Poly lactic acid (PLA) Gamma-irradiated                                    | Anaerobic digestion             | -                                                                | 280 mL             | 37 and 58 °C            | 56 days               | Laboratory    | 37 °C: 0.19%<br>58 °C: 98.96<br><i>gamma-irradiated PLA lost 45%</i> | -                                                           |
| [39]      | Poly hydroxybutyrate (PHB)                                                 | Anaerobic digestion             | -                                                                | 240 mL             | 35 °C                   | 32 weeks              | Laboratory    | 100                                                                  | -                                                           |
| [40]      | Starch: poly vinyl alcohol (TPS: PVOH)<br>w/w%: 90:10, 75:25, 50:50, 0:100 | Anaerobic digestion             | -                                                                | 200 mL             | 38 °C                   | 100 h                 | Laboratory    | -                                                                    | -                                                           |

| Reference | Type plastic                                                                                                                    | Degradation         | Co-substrate                                                                                                                               | Working volume | Temperature          | Duration  | Scale           | % Biodegradation                                                                  | Biogas                                                                        |
|-----------|---------------------------------------------------------------------------------------------------------------------------------|---------------------|--------------------------------------------------------------------------------------------------------------------------------------------|----------------|----------------------|-----------|-----------------|-----------------------------------------------------------------------------------|-------------------------------------------------------------------------------|
| [41]      | Poly lactide (PLA)-based Rubbish collection bags (50% PLA)<br>Fresh-keeping bags (90% PLA)<br>Drinking cups (80%PLA)            | Anaerobic digestion | Synthesized kitchen waste (Cabbage, Potato, Apple, Carrot, Fish <sup>[1]</sup> , Pork (raw), Rice, Tea leaves, Used paper <sup>[1]</sup> ) | 1 L            | 52 °C                | 8 weeks   | Laboratory      | PLA (50%): 37%<br>PLA (90%): 80%<br>PLA (80%): 52%                                | PLA (50%): 276 NL/kg-VS<br>PLA (90%): 598 NL/kg-VS<br>PLA (80%): 389 NL/kg-VS |
| [42]      | Poly (lactic acid) (PLA)                                                                                                        | Anaerobic digestion | -                                                                                                                                          | 1.5 L          | 37 and 55 °C         | 75 days   | Laboratory      | PLA (35 °C): 21%<br>PLA (55°C): 93%                                               | PCL: 10.6 L<br>PLA: 6.86                                                      |
| [43]      | Poly (lactic acid) (PLA)<br>Poly caprolactone (PCL)                                                                             | Anaerobic digestion | -                                                                                                                                          | 1.5 L          | 55 °C                | 75 days   | Laboratory      | PCL: 92%<br>PLA: 79%                                                              | PCL: 10.6 L<br>PLA: 6.86                                                      |
| [44]      | Poly lactic acid (PLA)                                                                                                          | Landfill            | Municipal solid waste                                                                                                                      | -              | -                    | 15 months | real conditions | -                                                                                 | -                                                                             |
| [45]      | Degradable plastic additive <sup>[1]</sup><br>Biodegradable synthetic resin                                                     | Anaerobic digestion | -                                                                                                                                          | 1 L            | -                    | 32 days   | Laboratory      | Plastic with additive: 0.02<br>Biodegradable synthetic resin: 26.9 <sup>[1]</sup> | 245 ml MB                                                                     |
| [46]      | Polyurethane (PU)                                                                                                               | Anaerobic digestion | -                                                                                                                                          | 1 L            | -                    | 45 days   | Laboratory      | 0                                                                                 | -                                                                             |
| [47]      | Poly (vinyl chloride) (PVC)                                                                                                     | Landfill            | Municipal solid waste                                                                                                                      | Real           | 35 °C                | 90 days   | Real conditions | -                                                                                 | -                                                                             |
| [48]      | Poly (vinyl chloride) (PVC)                                                                                                     | Landfill            | Artificial municipal solid waste                                                                                                           | 5 L            | 20, 37, 55 and 70 °C | 40 days   | Laboratory      | -                                                                                 | -                                                                             |
| [49]      | Polycaprolactone (PCL)<br>Polylactic acid (PLA)<br>Blend starch C polycaprolactone<br>Poly (butadiene adipate-co-terephthalate) | Anaerobic digestion | -                                                                                                                                          | 250 mL         | 35 °C                | 28 days   | Laboratory      | -                                                                                 | -                                                                             |
| [50]      | polyhydroxybutyrate (PHB)<br>(hydroxybutyrate-co-hydroxyvalerate) (PHBV)<br>Poly (ε-caropclacton) (PCL)                         | Anaerobic digestion | -                                                                                                                                          | -              | 37 °C                | 42 days   | Laboratory      | PHB: 100<br>PHBV: 57<br>PCL: 30                                                   | -                                                                             |



| Reference | Type plastic                                                                                                                                              | Degradation                     | Co-sustrate                                                                                                                               | Working volume | Temperature           | Duration             | Scale      | % Biodegradation               | Biogas |
|-----------|-----------------------------------------------------------------------------------------------------------------------------------------------------------|---------------------------------|-------------------------------------------------------------------------------------------------------------------------------------------|----------------|-----------------------|----------------------|------------|--------------------------------|--------|
| [51]      | polyhydroxybutyrate and hydroxyvalerate (PHBV)<br>polycaprolactone plastic (PCL)<br>Blend of starch and polyvinyl alcohol (SPVA)<br>ellulose acetate (CA) | Anaerobic digestion<br>Landfill | Synthesized waste which contained equivalent weights of yard waste, kitchen garbage, paper waste, dry dog-food, dewatered sludge and soil | 300 mL         | -                     | 120 days             | Laboratory | PHBV: 100%                     | -      |
| [52]      | Poly(3-hydroxybutyrate-co-3-hydroxyoctanoate), PHBO<br>C-PCL (poly-ε-caprolactone)                                                                        | Anaerobic digestion<br>Landfill | Mixture of shredded fresh MSW                                                                                                             | 500mL          | 35 °C<br>38 °C        | 721 days             | Laboratory | PHBO: 45.2<br>C-PCL: 40        | -      |
| [53]      | Polyhydroxybutyrate and hydroxyvalerate (PHBV)<br>Polyhydroxybutyrate (PHB)                                                                               | Anaerobic digestion             | -                                                                                                                                         | 1 L            | 37 °C                 | -                    | Laboratory | -                              | -      |
| [54]      | Poly(vinyl chloride) PVC                                                                                                                                  | Landfill                        | Household waste                                                                                                                           | 100 L          | 30 °C                 | 4 years              | Laboratory | -                              | -      |
| [55]      | Poly(vinyl chloride) (PVC)                                                                                                                                | Landfill                        | Household waste                                                                                                                           | 100 L          | 30 °C                 | -                    | Laboratory | -                              | -      |
| [56]      | low-density polyethylene film (LDPE)                                                                                                                      | Landfill                        | -                                                                                                                                         | -              | 25, 50, 80 and 105 °C | -                    | Laboratory | -                              | -      |
| [57]      | low-density polyethylene film (LDPE) /rice starch                                                                                                         | Landfill                        | -                                                                                                                                         | -              | 37 °C                 | 180 days             | Laboratory | LDPE/rice starch (60/40): 21.4 | -      |
| [58]      | Lignified cellulose (LC), a citric acid cross-linked cellulose (x-C),                                                                                     | Landfill                        | Fresh refuse, and decomposed refuse                                                                                                       | 2 L            | 38 °C                 | 6 months             | Laboratory | LC: 25.67<br>XC: 52.04         | -      |
| [59]      | low-density polyethylene film (LDPE) Starch                                                                                                               | Landfill                        | -                                                                                                                                         | -              | 37 °C                 | 180 days             | Laboratory | LDPE/starch (60/40): 27.3      | -      |
| [60]      | Poly-3-hydroxybutyrate-co-3-hydroxyvalerate (PHBV)                                                                                                        | Anaerobic digestion             | -                                                                                                                                         | 500 mL         | 35 °C                 | 30 days              | Laboratory | 90%                            | -      |
| [61]      | Poly(3-hydroxybutyrate-co-3-hydroxyvalerate) (PHB/HV; 92/8, w/w)<br>Poly-lactic acid                                                                      | Anaerobic digestion<br>Landfill | Synthetic MSW                                                                                                                             | 160 mL         | 35 °C                 | 100 days<br>6 months | Laboratory | 89%<br>PHB/HV: 80%             | -      |
| [62]      | Starch acetates                                                                                                                                           | Anaerobic digestion             | Municipal solid waste                                                                                                                     | 3.5 L          | 37 °C                 | 90 days              | Laboratory | -                              | -      |
| [63]      | Poly-β-hydroxyalkanoates                                                                                                                                  | Anaerobic digestion             | -                                                                                                                                         | 125 mL         | 15 °C                 | -                    | Laboratory | -                              | -      |
| [64]      | Poly(lactic acid)<br>Polylactone, and poly(hydroxybutyrate/valerate)<br>Starch/PE                                                                         | Anaerobic digestion             | -                                                                                                                                         | 160 mL         | 35 °C                 | 40 days              | Laboratory | -                              | -      |

| Reference | Type plastic                                                                                                           | Degradation         | Co-sustrate           | Working volume | Temperature | Duration | Scale           | % Biodegradation                                      | Biogas                                                                   |
|-----------|------------------------------------------------------------------------------------------------------------------------|---------------------|-----------------------|----------------|-------------|----------|-----------------|-------------------------------------------------------|--------------------------------------------------------------------------|
| [65]      | Poly-ε-caprolactone                                                                                                    | Anaerobic digestion | -                     | -              | 30 °C       | 7 days   | Laboratory      | -                                                     | -                                                                        |
| [66]      | Low-density polyethylene film (LDPE) starch-based/between 70 and 90% starch                                            | Anaerobic digestion | --                    | 119 mL         | 30 °C       | 28 days  | Laboratory      | -                                                     | -                                                                        |
| [67]      | Low-density polyethylene (LDPE) LDPE + 5.5% cornstarch Linear low-density polyethylene (LLDPE) LLDPE + 5.5% cornstarch | Landfill            | Municipal solid waste | -              | 10 °C       | 2 years  | Real conditions | -                                                     | -                                                                        |
| [68]      | Poly (3-hydroxybutyrate) Copolymerpoly(3-hydroxybutyrate-co-3-hydroxyvalerate)                                         | Anaerobic digestion | -                     | 59 mL          | 35 °C       | 16 days  | Laboratory      | PHB: 87<br>P (HB-co-13%HV): 96<br>P (HB-co-20%HV): 83 | PHB: 0.20 mmol<br>P(HB-co-13%HV): 0.23 mmol<br>P(HB-co-20%HV): 0.20 mmol |
| [69]      | Copolymer of cellulose acetate Polystyrene maleic anhydride (50/50%)                                                   | Anaerobic digestion | -                     | 155 mL         | 37 °C       | 98 days  | Laboratory      | -                                                     | -                                                                        |
| [70]      | Polyethylene (PE) + 6% starch (A; B, and C) PE +10-12% starch PHB/PHV PVA                                              | Anaerobic digestion | -                     | -              | 58 °C       | 60 days  | Laboratory      | PHB/PHV: 91.4                                         | -                                                                        |

## References

1. Zhang, W.; Heaven, S.; Banks, C.J. Degradation of some EN13432 compliant plastics in simulated mesophilic anaerobic digestion of food waste. *Polym. Degrad. Stab.* **2018**, *147*, 76–88.
2. Wang, S.; Lydon, K.A.; White, E.M.; Grubbs III, J.B.; Lipp, E.K.; Locklin, J.; Jambeck, J.R. Biodegradation of Poly(3-hydroxybutyrate-co-3-hydroxyhexanoate) Plastic under Anaerobic Sludge and Aerobic Seawater Conditions: Gas Evolution and Microbial Diversity. *Environ. Sci. Technol.* **2018**, *52*, 5700–5709.
3. Lim, J.W.; Ting, D.W.Q.; Loh, K.-C.; Ge, T.; Tong, Y.W. Effects of disposable plastics and wooden chopsticks on the anaerobic digestion of food waste. *Waste Manag.* **2018**, *79*, 607–614.
4. Ryan, C.A.; Billington, S.L.; Criddle, C.S. Biocomposite fiber-matrix treatments that enhance in-service performance can also accelerate end-of-life fragmentation and anaerobic biodegradation to methane. *J. Polym. Environ.* **2018**, *26*, 1715–1726.
5. Xia, T.; Huang, H.; Wu, G.; Sun, E.; Jin, X.; Tang, W. The characteristic changes of rice straw fibers in anaerobic digestion and its effect on rice straw-reinforced composites. *Ind. Crop. Prod.* **2018**, *121*, 73–79.
6. Ryan, C.A.; Billington, S.L.; Criddle, C.S. Methodology to assess end-of-life anaerobic biodegradation kinetics and methane production potential for composite materials. *Compos. Part A: Appl. Sci. Manuf.* **2017**, *95*, 388–399.
7. Ryan, C.A.; Billington, S.L.; Criddle, C.S. Assessment of models for anaerobic biodegradation of a model bioplastic: Poly(hydroxybutyrate-co-hydroxyvalerate). *Bioresour. Technol.* **2017**, *227*, 205–213.
8. Moon, J.; Kim, M.Y.; Kim, B.M.; Lee, J.C.; Choi, M.-C.; Kim, J.R. Estimation of the Microbial Degradation of Biodegradable Polymer, Poly(lactic acid) (PLA) with a Specific Gas Production Rate. *Macromol. Res.* **2016**, *24*, 415–421.
9. Boonmee, J.; Kositanont, C.; Leejarkpa, T. Biodegradation of poly (lactic acid), poly (hydroxybutyrate-co-hydroxyvalerate), poly (butylene succinate) and poly (butylene adipate-co-terephthalate) under anaerobic and oxygen limited thermophilic conditions. *EnvironmentAsia* **2016**, *9*.
10. Adamcova, D.; Vaverková, M.D. New Polymer Behavior Under the Landfill Conditions. *Waste Biomass-Valorization* **2016**, *7*, 1459–1467.
11. Šmejkalová, P.; Kužníková, V.; Merna, J.; Hermanová, S.; Mejkalova, P.; Nikova, V.K. Anaerobic digestion of aliphatic polyesters. *Water Sci. Technol.* **2016**, *73*, 2386–2393.
12. Liu, W.W.; Xue, J.; Cheng, B.J.; Zhu, S.W.; Ma, Q.; Ma, H. Anaerobic biodegradation, physical and structural properties of normal and high-amylose maize starch films. *Int. J. Agric. & Biol. Eng.* **2016**, *9*, 184–193.
13. Lee, J.C.; Moon, J.H.; Jeong, J.H.; Kim, M.Y.; Kim, B.M.; Choi, M.C.; Ha, C.S. Biodegradability of poly (lactic acid)(PLA)/lactic acid (LA) blends using anaerobic digester sludge. *Macromol. Res.* **2016**, *24*, 741–747.
14. Nauendorf, A.; Krause, S.; Bigalke, N.K.; Gorb, E.V.; Gorb, S.N.; Haeckel, M.; Treude, T. Microbial colonization and degradation of polyethylene and biodegradable plastic bags in temperate fine-grained organic-rich marine sediments. *Mar. Pollut. Bull.* **2016**, *103*, 168–178..
15. Mackuľák, T.; Takáčová, A.; Gál, M.; Marton, M.; Ryba, J. PVC degradation by Fenton reaction and biological decomposition. *Polym. Degrad. Stab.* **2015**, *120*, 226–231.
16. Dvořáčková, M.; Svoboda, P.; Kostka, L.; Pekařová, S. Influence of biodegradation in thermophilic anaerobic aqueous conditions on crystallization of poly(butylene succinate). *Polym. Test.* **2015**, *47*, 59–70.
17. Petit, M.G.; Correa, Z.; Sabino, M.A. Degradation of a Polycaprolactone/Eggshell Biocomposite in a Bioreactor. *J. Polym. Environ.* **2015**, *23*, 11–20.
18. Muenmee, S.; Chiemchaisri, W.; Chiemchaisri, C. Microbial consortium involving biological methane oxidation in relation to the biodegradation of waste plastics in a solid waste disposal open dump site. *Int. Biodeterior. Biodegradation* **2015**, *102*, 172–181.
19. Iwańczuk, A.; Kozłowski, M.; Łukaszewicz, M.; Jabłoński, S. Anaerobic Biodegradation of Polymer Composites Filled with Natural Fibers. *J. Polym. Environ.* **2015**, *23*, 277–282.
20. Selke, S.; Auras, R.; Nguyen, T.A.; Castro Aguirre, E.; Cheruvathur, R.; Liu, Y. Evaluation of biodegradation-promoting additives for plastics. *Environ. Sci. Technol.* **2015**, *49*, 3769–3777.
21. Hermanová, S.; Šmejkalová, P.; Merna, J.; Zarevúcka, M. Biodegradation of waste PET based copolyesters in thermophilic anaerobic sludge. *Polym. Degrad. Stab.* **2015**, *111*, 176–184.
22. Adamcova, D.; Vaverková, M. Degradation of biodegradable/degradable plastics in municipal solid-waste landfill. *Polish J. Environ. Stud.* **2014**, *23*, 1071–1078.

23. Gómez, E.F.; Luo, X.; Li, C.; Michel, F.C.; Li, Y. Biodegradability of crude glycerol-based polyurethane foams during composting, anaerobic digestion and soil incubation. *Polym. Degrad. Stab.* **2014**, *102*, 195–203.
24. Masood, F.; Yasin, T.; Hameed, A. Comparative oxo-biodegradation study of poly-3-hydroxybutyrate-co-3-hydroxyvalerate/polypropylene blend in controlled environments. *Int. Biodeterior. Biodegradation* **2014**, *87*, 1–8.
25. Yagi, H.; Ninomiya, F.; Funabashi, M.; Kunioka, M. Mesophilic anaerobic biodegradation test and analysis of eubacteria and archaea involved in anaerobic biodegradation of four specified biodegradable polyesters. *Polym. Degrad. Stab.* **2014**, *110*, 278–283.
26. Gómez, E.F.; Michel, F.C. Biodegradability of conventional and bio-based plastics and natural fiber composites during composting, anaerobic digestion and long-term soil incubation. *Polym. Degrad. Stab.* **2013**, *98*, 2583–2591.
27. Yagi, H.; Ninomiya, F.; Funabashi, M.; Kunioka, M. Thermophilic anaerobic biodegradation test and analysis of eubacteria involved in anaerobic biodegradation of four specified biodegradable polyesters. *Polym. Degrad. Stab.* **2013**, *98*, 1182–1187.
28. Kolstad, J.J.; Vink, E.T.H.; De Wilde, B.; Debeer, L. Assessment of anaerobic degradation of Ingeo™ polylactides under accelerated landfill conditions. *Polym. Degrad. Stab.* **2012**, *1131–1141*.
29. Yagi, H.; Ninomiya, F.; Funabashi, M.; Kunioka, M. Anaerobic Biodegradation of Poly (Lactic Acid) Film in Anaerobic Sludge. *J. Polym. Environ.* **2012**, *20*, 673–680.
30. Tollner, E.W.; Annis, P.A.; Das, K.C. Evaluation of Strength Properties of Polypropylene-Based Polymers in Simulated Landfill and Oven Conditions. *J. Environ. Eng.* **2011**, *137*, 291–296.
31. Cho, H.S.; Moon, H.S.; Kim, M.; Nam, K.; Kim, J.Y. Biodegradability and biodegradation rate of poly(caprolactone)-starch blend and poly(butylene succinate) biodegradable polymer under aerobic and anaerobic environment. *Waste Manag.* **2011**, *31*, 475–480.
32. Yagi, H.; Ninomiya, F.; Funabashi, M.; Kunioka, M. RNA analysis of anaerobic sludge during anaerobic biodegradation of cellulose and poly(lactic acid) by RT-PCR–DGGE. *Polym. Degrad. Stab.* **2011**, *96*, 547–552.
33. Morse, M.C.; Liao, Q.; Criddle, C.S.; Frank, C.W. Anaerobic biodegradation of the microbial copolymer poly(3-hydroxybutyrate- co-3-hydroxyhexanoate): Effects of comonomer content, processing history, and semi-crystalline morphology. *Polymer (Guildf)*. **2011**, *52*, 547–556.
34. Guo, M.; Trzcinski, A.P.; Stuckey, D.C.; Murphy, R.J. Anaerobic digestion of starch–polyvinyl alcohol biopolymer packaging: Biodegradability and environmental impact assessment. *Bioresour. Technol.* **2011**, *102*, 11137–11146.
35. Wang, F.; Tsuno, H.; Hidaka, T.; Tsubota, J. Promotion of polylactide degradation by ammonia under hyperthermophilic anaerobic conditions. *Bioresour. Technol.* **2011**, *102*, 9933–9941.
36. Shi, B.; Palfery, D. Enhanced mineralization of PLA meltblown materials due to plasticization. *J. Polym. Environ.* **2010**, *18*, 122–127.
37. Yagi, H.; Ninomiya, F.; Funabashi, M.; Kunioka, M. Bioplastic biodegradation activity of anaerobic sludge prepared by preincubation at 55°C for new anaerobic biodegradation test. *Polym. Degrad. Stab.* **2010**, *95*, 1349–1355.
38. Vargas, L.F.; Welt, B.A.; Teixeira, A.; Pullammanappallil, P.; Balaban, M.; Beatty, C. Biodegradation of treated polylactic acid (PLA) under anaerobic conditions. *Trans. ASABE* **2009**, *52*, 1025–1030.
39. Gutierrez-Wing, M.T.; Stevens, B.E.; Theegala, C.S.; Negulescu, I.I.; Rusch, K.A.; M.A.S.C.E., P.E. Anaerobic biodegradation of polyhydroxybutyrate in municipal sewage sludge. *J. Environ. Eng.* **2010**, *136*, 709–718.
40. Russo, M.A.L.; O'Sullivan, C.; Rounsefell, B.; Halley, P.J.; Truss, R.; Clarke, W.P. The anaerobic degradability of thermoplastic starch: Polyvinyl alcohol blends: Potential biodegradable food packaging materials. *Bioresour. Technol.* **2009**, *100*, 1705–1710.
41. Xiao, D.; Matsuda, J.; Liu, B.; Ohmiya, K. Characteristics of fermentation of biodegradable plastics mixed with household solid waste by thermophilic dry anaerobic co-digestion. *J. Japanese Soc. Agric. Mach.* **2009**, *71*, 55–62.
42. Yagi, H.; Ninomiya, F.; Funabashi, M.; Kunioka, M. Anaerobic biodegradation tests of poly(lactic acid) under mesophilic and thermophilic conditions using a new evaluation system for methane fermentation in anaerobic sludge. *International J. Mol. Sci.* **2009**, *10*, 3824–3835.
43. Yagi, H.; Ninomiya, F.; Funabashi, M.; Kunioka, M. Anaerobic biodegradation tests of poly(lactic acid) and polycaprolactone using new evaluation system for methane fermentation in anaerobic sludge. *Polym. Degrad. Stab.* **2009**, *94*, 1397–1404.

44. Rudeekit, Y.; Numnoi, J.; Tajan, M.; Chaiwutthinan, P.; Leejarkpai, T. Determining biodegradability of polylactic acid under different environments. *J. Met. Mater. Miner.* **2008**, *18*, 83–87.
45. Mohee, R.; Unmar, G.D.; Mudhoo, A.; Khadoo, P. Biodegradability of biodegradable/degradable plastic materials under aerobic and anaerobic conditions. *Waste Manag.* **2008**, *28*, 1624–1629.
46. Urgan-Demirtas, M.; Singh, D.; Pagilla, K. Laboratory investigation of biodegradability of a polyurethane foam under anaerobic conditions. *Polym. Degrad. Stab.* **2007**, *92*, 1599–1610.
47. Grossman, R.F.; Schleicher Jr., J.E.; D'Alessio, L. Considerations affecting landfill biodegradability of PVC. *J. Vinyl Addit. Technol.* **2007**, *13*, 133–135.
48. Björn, A.; Hörsing, M.; Karlsson, A.; Mersiowsky, I.; Ejlertsson, J. Impacts of temperature on the leaching of organotin compounds from poly(vinyl chloride) plastics-A study conducted under simulated landfill conditions. *J. Vinyl Addit. Technol.* **2007**, *13*, 176–188.
49. Massardier-Nageotte, V.; Pestre, C.; Cruard-Pradet, T.; Bayard, R. Aerobic and anaerobic biodegradability of polymer films and physico-chemical characterization. *Polym. Degrad. Stab.* **2006**, *91*, 620–627.
50. Abou-Zeid, D.; Müller, R.-J.; Deckwer, W.-D. Biodegradation of aliphatic homopolyesters and aliphatic-aromatic copolyesters by anaerobic microorganisms. *Biomacromolecules* **2004**, *5*, 1687–1697, 2004.
51. Ishigaki, T.; Sugano, W.; Nakanishi, A.; Tateda, M.; Ike, M.; Fujita, M. The degradability of biodegradable plastics in aerobic and anaerobic waste landfill model reactors. *Chemosphere*, **2004**, *54*, 225–233.
52. Federle, T.W.; Barlaz, M.A.; Pettigrew, C.A.; Kerr, K.M.; Kemper, J.J.; Nuck, B.A.; Schechtman, L.A. Anaerobic biodegradation of aliphatic polyesters: poly(3-hydroxybutyrate-co-3-hydroxyoctanoate) and poly( $\epsilon$ -caprolactone). *Biomacromolecules* **2002**, *3*, 813–822.
53. Abou-Zeid, D.-M.; Müller, R.-J.; Deckwer, W.-D. Degradation of natural and synthetic polyesters under anaerobic conditions. *J. Biotechnol.* **2001**, *86*, 113–126.
54. Mersiowsky, I.; Weller, M.; Ejlertsson, J. Fate of plasticised PVC products under landfill conditions: a laboratory-scale landfill simulation reactor study. *Water Res.* **2001**, *35*, 3063–3070.
55. Mersiowsky, I.; Stegmann, R.; Ejlertsson, J. Long term behaviour of poly(vinyl chloride) products under soil buried and landfill conditions. *Plast. Rubber Compos.* **1999**, *28*, 321–326.
56. Haider, N.; Karlsson, S. Migration and release profile of Chimassorb 944 from low-density polyethylene film (LDPE) in simulated landfills. *Polym. Degrad. Stab.* **1999**, *64*, 321–328.
57. Arvanitoyannis, I.; Biliaderis, C.G.; Ogawa, H.; Kawasaki, N. Biodegradable films made from low-density polyethylene (LDPE), rice starch and potato starch for food packaging applications: Part 1. *Carbohydr. Polym.* **1998**, *36*, 89–104.
58. Röss, B.B.; Calvert, P.P.; Pettigrew, C.A.; Barlaz, M.A. Testing anaerobic biodegradability of polymers in a laboratory-scale simulated landfill. *Environ. Sci. Technol.*, **1998**, *32*, 821–827.
59. Psomiadou, E.; Arvanitoyannis, I.; Biliaderis, C.G.; Ogawa, H.; Kawasaki, N. Biodegradable films made from low density polyethylene (LDPE), wheat starch and soluble starch for food packaging applications. Part 2. *Carbohydr. Polym.* **1997**, *33*, 227–242.
60. Reischwitz, A.; Stoppok, E.; Buchholz, K. Anaerobic degradation of poly-3-hydroxybutyrate and poly-3-hydroxybutyrate-co-3-hydroxyvalerate. *Biodegradation* **1997**, *8*, 313–319.
61. Shin, P.K.; Kim, M.H.; Kim, J.M. Biodegradability of degradable plastics exposed to anaerobic digested sludge and simulated landfill conditions. *J. Environ. Polym. Degrad.* **1997**, *5*, 33–39.
62. Rivard, C.; Moens, L.; Roberts, K.; Brigham, J.; Kelley, S. Starch esters as biodegradable plastics: Effects of ester group chain length and degree of substitution on anaerobic biodegradation. *Enzyme Microb. Technol.* **1995**, *17*, 848–852.
63. Mas-Castellà, J.; Urmeneta, J.; Lafuente, R.; Navarrete, A.; Guerrero, R. Biodegradation of Poly- $\beta$ -hydroxyalkanoates in anaerobic sediments. *Int. Biodeterior. Biodegradation* **1995**, *35*, 155–174.
64. Day, M.; Shaw, K.; Cooney, D. Biodegradability: An assessment of commercial polymers according to the Canadian method for anaerobic conditions. *J. Environ. Polym. Degrad.* **1994**, *2*, 121–127.
65. Nishida, H.; Tokiwa, Y. Confirmation of anaerobic poly(2-oxepanone) degrading microorganisms in environments. *Chem. Lett.* **1994**, *23*, 1293–1296.
66. van der Zee, M.; Sijtsma, L.; Tan, G.B.; Tournois, H.; de Wit, D. Assessment of biodegradation of water insoluble polymeric materials in aerobic and anaerobic aquatic environments. *Chemosphere* **1994**, *28*, 1757–1771.
67. Breslin, V.T. Degradation of starch-plastic composites in a municipal solid waste landfill. *J. Environ. Polym. Degrad.* **1993**, *1*, 127–141.

68. Budwill, K.; Fedorak, P.M.; Page, W.J. Methanogenic degradation of poly(3-hydroxyalkanoates). *Appl. Environ. Microbiol.* **1992**, *58*, 1398–1401.
69. Rivard, C.J.; Adney, W.S.; Himmel, M.E.; Mitchell, D.J.; Vinzant, T.B.; Grohmann, K.; Chum, H. Effects of natural polymer acetylation on the anaerobic bioconversion to methane and carbon dioxide. *Appl. Biochem. Biotechnol.* **1992**, *34*, 725–736.
70. Krupp, L.R.; Jewell, W.J. Biodegradability of modified plastic films in controlled biological environments. *Environ. Sci. Technol.* **1992**, *26*, 193–198.

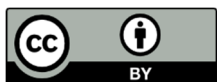

© 2019 by the authors. Submitted for possible open access publication under the terms and conditions of the Creative Commons Attribution (CC BY) license (<http://creativecommons.org/licenses/by/4.0/>).
